FALL 2023 | VOLUME 35 | NUMBER 4

The Journal of  
**Neuropsychiatry**  
and Clinical Neurosciences

## ChatGPT

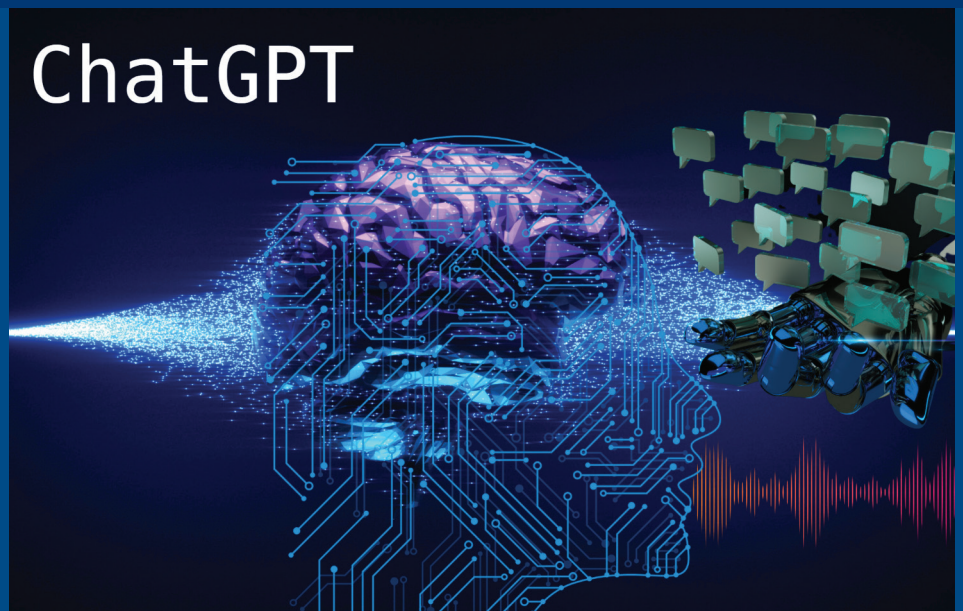

Time for Brain Medicine

Mania Following Traumatic Brain Injury: A Systematic Review

Measuring Antisocial Behaviors in Behavioral Variant  
Frontotemporal Dementia With a Novel  
Informant-Based Questionnaire

Alterations in Resting-State Interhemispheric Coordination With  
Refractory Auditory Verbal Hallucinations in Schizophrenia

Changes in Posttraumatic Stress Disorder Symptoms  
With Integrative Psychotherapy for Functional  
Neurological Symptom Disorder

Official Journal of the American Neuropsychiatric Association  
[neuro.psychiatryonline.org](http://neuro.psychiatryonline.org)
