# NEW RESOURCES ON NEUROPSYCHIATRY

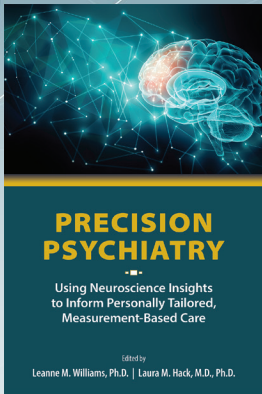

## Precision Psychiatry

Using Neuroscience Insights to Inform Personally Tailored, Measurement-Based Care

Edited by Leanne M. Williams, Ph.D., and Laura M. Hack, M.D., Ph.D.

Precision psychiatry, as outlined in this groundbreaking book, presents a new path forward. By integrating findings from basic and clinical neuroscience, clinical practice, and population-level data, the field seeks to develop therapeutic approaches tailored for specific individuals with a specific constellation of health issues, characteristics, strengths, and symptoms.

2022 • 300 pages • ISBN 978-1-61537-158-7 • Paperback • \$72.00 • Item #37158

2022 • 300 pages • ISBN 978-1-61537-445-8 • eBook • \$58.00 • Item #37445

## Concise Guide to Neuropsychiatry and Behavioral Neurology, Third Edition

Edited by John J. Barry, M.D., Sepideh Bajestan, M.D., Ph.D., Jeffrey L. Cummings, M.D., and Michael R. Trimble, M.D., F.R.C.P., F.R.C.Psych.

This third edition combines all of the scientific rigor of its predecessors with a renewed emphasis on kind, empathetic care. It has been updated to account for the development of new techniques in brain imaging; improvement in electrophysiological methods to better detect epilepsy and sleep disorders; and a growing list of blood and spinal fluid biomarkers that have revolutionized diagnostic capability.

2023 • 416 pages • ISBN 978-1-61537-409-0 • Paperback • \$68.00 • Item #37409

2023 • 416 pages • ISBN 978-1-61537-410-6 • eBook • \$54.00 • Item #37410

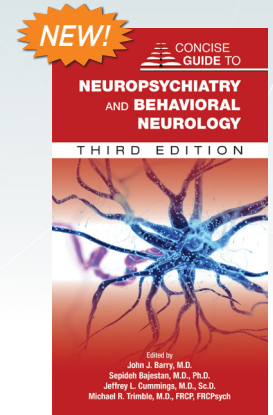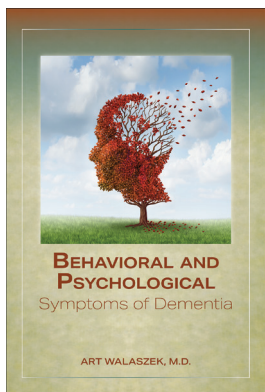

## Behavioral and Psychological Symptoms of Dementia

Art Walaszek, M.D.

The book provides readers with evidence-based, pragmatic, and clear recommendations regarding the care of patients with behavioral and psychological symptoms of dementia.

2020 • 284 pages • ISBN 978-1-61537-168-6 • Paperback • \$65.00 • Item #37168

2020 • 284 pages • ISBN 978-1-61537-267-6 • eBook • \$52.00 • Item #37267

## Brain Stimulation Therapies for Clinicians, Second Edition

Edmund S. Higgins, M.D., and Mark S. George, M.D.

A comprehensive survey of the state of current practice, this new edition provides thoroughly updated information on the growing list of electrical stimulation therapies now in use or under study.

2020 • 197 pages • ISBN 978-1-61537-167-9 • Hardcover • \$72.00 • Item #37167

2020 • 197 pages • ISBN 978-1-61537-270-6 • eBook • \$58.00 • Item #37270

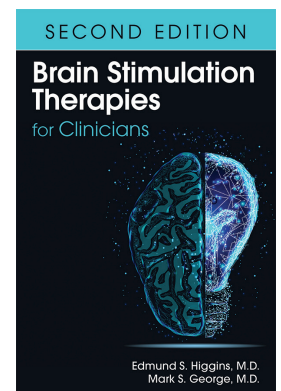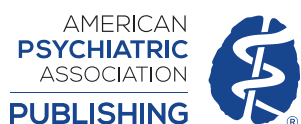

ORDER @ [www.appi.org](http://www.appi.org) | Email: [appi@psych.org](mailto:appi@psych.org) | Toll Free: 1-800-368-5777

20% Discount for American Psychiatric Association Members

25% Discount for APA Resident-Fellow Members

Follow us on  and 

AH2227
